# Supplementary material for: Metabolite Formation by Fungal Pathogens of Potatoes (Solanum tuberosum L.) in the Presence of Bioprotective Agents
Source: MDPI journal article supplement (doi:10.3390/ijerph20065221), 2023-03-22
Supplement: s1 [file s1]

**Table S1.** LC-MS/MS secondary metabolite analysis of control samples – MEA and potato.

| Components         | Concentration Mean $\pm$ SD [ng/g] |                         |
|--------------------|------------------------------------|-------------------------|
|                    | Control sample – MEA               | Control sample – potato |
| Beauvericin        | < LOD                              | 0.686 $\pm$ 0.820       |
| Bikaverin          | < LOD                              | 4.24 $\pm$ 4.93         |
| Brevianamide F     | 530 $\pm$ 10.7                     | < LOD                   |
| Cordycepin         | 13.8 $\pm$ 13.1                    | 44.3 $\pm$ 5.34         |
| cyclo(L-Leu-L-Pro) | < LOD                              | < LOD                   |
| cyclo(L-Pro-L-Tyr) | 5710 $\pm$ 127                     | < LOD                   |
| cyclo(L-Pro-L-Val) | 3770 $\pm$ 141                     | < LOD                   |
| Cytochalasin E     | < LOD                              | 14.2 $\pm$ 12.7         |
| Daidzein           | 1220 $\pm$ 195                     | < LOD                   |
| Daidzin            | 132 $\pm$ 96.7                     | < LOD                   |
| Deoxygerfelin      | < LOD                              | 14.3 $\pm$ 18.2         |
| Fellutanine A      | 25.8 $\pm$ 2.51                    | < LOD                   |
| Genistein          | 1070 $\pm$ 164                     | < LOD                   |
| Genistin           | 186 $\pm$ 223                      | < LOD                   |
| Glycitein          | 302 $\pm$ 32.4                     | < LOD                   |
| Glycitin           | 98.6 $\pm$ 58.9                    | < LOD                   |
| Isosulochrin       | < LOD                              | 0.351 $\pm$ 0.040       |
| Lecanoric acid     | < LOD                              | 6.25 $\pm$ 5.60         |
| Monocerin          | < LOD                              | 45.0 $\pm$ 45.5         |
| Nonactin           | < LOD                              | 0.150 $\pm$ 0.025       |
| Rosellichalasin    | < LOD                              | 13.7 $\pm$ 17.8         |
| Rugulusovin        | 88.1 $\pm$ 4.04                    | < LOD                   |
| Solanine           | < LOD                              | 133000 $\pm$ 68200      |
| Sulochrin          | < LOD                              | 0.399 $\pm$ 0.540       |
| Terragine          | < LOD                              | 363 $\pm$ 66.7          |
| Tryptophol         | < LOD                              | 4.34 $\pm$ 2.70         |
| Violaceol II       | < LOD                              | 0.609 $\pm$ 0.184       |

&lt;LOD – below limit of detection

**Table S2.** Analytical parameters of LC-MS/MS.

| Compound               | LOQ [ng/g] | LOD [ng/g] |
|------------------------|------------|------------|
| 4-Hydroxyalternariol   | 9.58       | 2.87       |
| Absciscic acid         | 0.50       | 0.15       |
| Acuminatum B           | 24.35      | 7.31       |
| Acuminatum C           | 61.68      | 18.50      |
| Alteichin              | 1.00       | 0.30       |
| Alternariol            | 0.32       | 0.10       |
| Alternariolmethylether | 0.51       | 0.15       |
| Altersetin             | 3.61       | 1.08       |
| Altertoxin-I           | 4.86       | 1.46       |

|                      |       |       |
|----------------------|-------|-------|
| Asteric acid         | 0.50  | 0.15  |
| Aurofusarin          | 2.0   | 0.6   |
| Beauvericin A        | 0.09  | 0.03  |
| Beauvericin          | 0.09  | 0.03  |
| Bikaverin            | 1.54  | 0.46  |
| Brevianamide F       | 3.34  | 1.00  |
| Chaconine            | 30    | 10    |
| Chrysogin            | 1.86  | 0.56  |
| Citreorosein         | 2.47  | 0.74  |
| Cordycepin           | 0.6   | 0.2   |
| cyclo(L-Leu-L-Pro)   | 2.20  | 0.66  |
| cyclo(L-Pro-L-Tyr)   | 28.30 | 8.49  |
| cyclo(L-Pro-L-Val)   | 3.88  | 1.17  |
| Cyclosporin A        | 20.90 | 6.27  |
| Cyclosporin B        | 3.67  | 1.10  |
| Cyclosporin D        | 7.99  | 2.40  |
| Cyclosporin H        | 2.76  | 0.83  |
| Cytochalasin B       | 5.44  | 1.63  |
| Cytochalasin E       | 1.43  | 0.43  |
| Daidzein             | 5.6   | 1.7   |
| Daidzin              | 5.6   | 1.7   |
| Deoxygerfelin        | 0.07  | 0.02  |
| Diacetoxyscirpenol   | 0.5   | 0.15  |
| Dinactin             | 0.39  | 0.13  |
| Emodin               | 0.35  | 0.11  |
| Endocrocin           | 51.23 | 15.37 |
| Enniatin B           | 0.04  | 0.01  |
| Equisetin            | 2.30  | 0.69  |
| Fallacinol           | 0.35  | 0.11  |
| Fellutanine A        | 3.31  | 0.99  |
| Fusaric acid         | 30    | 10    |
| Genistein            | 8.1   | 2.7   |
| Genistin             | 20    | 6     |
| Gibepyron D          | 14.39 | 4.32  |
| Glycitein            | 4.1   | 2.1   |
| Glycitin             | 4.7   | 1.4   |
| Iso-Rhodoptilometrin | 0.12  | 0.03  |
| Isosulochrin         | 0.19  | 0.06  |
| Lecanoric acid       | 0.36  | 0.12  |
| Monactin             | 0.63  | 0.19  |
| Monocerin            | 0.20  | 0.06  |
| Nonactin             | 0.18  | 0.05  |
| Radicinin            | 1.64  | 0.60  |
| Rosellichalasin      | 7.7   | 2.3   |
| Rugulosoivin         | 2.25  | 0.67  |
| Sambutoxin           | 0.064 | 0.021 |

|                    |       |      |
|--------------------|-------|------|
| Secalonic acid D   | 2.86  | 0.86 |
| Siccanol           | 100   | 30   |
| Solanine           | 11    | 3.3  |
| Sterigmatocystin   | 0.25  | 0.08 |
| Sulochrin          | 0.52  | 0.16 |
| Tentoxin           | 0.36  | 0.11 |
| Terragine          | 100   | 30   |
| Trichodimerol      | 0.91  | 0.27 |
| Trichotetronine    | 7.47  | 2.24 |
| Tryptophol         | 12.85 | 3.86 |
| Violaceol I        | 12    | 3.6  |
| Violaceol II       | 0.21  | 0.07 |
| Vulpinic acid      | 0.17  | 0.06 |
| Xanthoquinoidin A1 | 3     | 1    |

LOD – Limit of detection; LOQ – Limit of quantification;
